# Supplementary material
Source: publisher site journal article supplement (https://www.dovepress.com/get_supplementary_file.php?f=473370.docx)
Supplement: Supplementary file 1 [file get_supplementary_file.php]

**Supplementary Table 1. Histological type distribution of 185 cases of non-mass breast lesions**

| **Pathological type** | Number of lesions, n (%) |
| --- | --- |
| **Histological types of lesions in benign group** |  |
| **Intraductal papilloma** | 28（28.00） |
| **Mammitis** | 14（14.00） |
| **Cyclomastopathy** | 23（23.00） |
| **Adenosis of breast** | 10（10.00） |
| **Radial scar** | 4（4.00） |
| **Fibrocystic change** | 21（21.00） |
| **Total** | 100 (100.00) |
| **Histological types of lesions in malignant group** |  |
| **DCIS** | 36（42.35） |
| **IDC** | 29（34.12） |
| **ILC** | 5（5.88） |
| **IDC+DCIS** | 15（17.65） |
| **Total** | 85 (100.00) |

DCIS: intraductal carcinoma in situ; IDC: invasive ductal carcinoma; ILC: invasive lobular carcinoma.

**Supplementary Table 2. Comparisons of baseline characteristics between non-mass breast cancer patients in the benign group and malignant group**

|  | | **Benign**  **n（%）** | **Malignant**  **n（%）** | **Total**  **n（%）** | **t/χ2** | ***P* value** |
| --- | --- | --- | --- | --- | --- | --- |
| Age, years old | | 53.18 ± 11.32 | 56.22 ± 10.16 |  | 1.137 | 0.346 |
| Famil history | Yes | 27（27.00） | 17（20.00） | 44（23.78） | 1.242 | 0.265 |
| No | 73（73.00） | 68（80.00） | 141（76.22） |
| Age of menarche | ≤13 | 46（46.00） | 45（52.94） | 91（49.19） | 0.886 | 0.347 |
| ＞13 | 54（54.00） | 40（47.06） | 94（50.81） |
| Menopausal or not | Yes | 44（44.00） | 37（43.53） | 81（43.78） | 0.004 | 0.949 |
| No | 56（56.00） | 48（56.47） | 104（56.21） |
| Overflow or not | Yes | 29（29.00） | 18（21.17） | 47（25.41） | 1.484 | 0.223 |
| No | 71（71.00） | 67（78.82） | 138（74.59） |
| Accessible or not | Yes | 18（18.00） | 23（27.06） | 41（22.16） | 2.186 | 0.193 |
| No | 82（82.00） | 62（72.94） | 144（77.84） |

*P* < 0.05 was considered of significant difference.
